# Supplementary material for: Internal consistency and concurrent validity of the Peruvian Infant Development Scale tool in high-altitude rural Andean Peru
Source: bioRxiv or medRxiv preprint supplement (doi:10.1101/2024.06.09.24308664), 2024-06-10
Supplement: Supplementary file [file media-1.pdf]

**Table S1.** Correlation matrix between ESDI and BSID (raw) scores by age group

|                                | BSID domains                     |                                        |                                        |                                        |                                      |                                       |
|--------------------------------|----------------------------------|----------------------------------------|----------------------------------------|----------------------------------------|--------------------------------------|---------------------------------------|
|                                | Cognitive                        | Receptive language                     | Expressive language                    | Fine motor                             | Gross motor                          |                                       |
| 19-30 months <sup>a</sup>      | ESDI domains                     |                                        |                                        |                                        |                                      |                                       |
|                                | Cognitive                        | <b>0.04 (-0.14, 0.22)</b>              | 0.40 (0.21, 0.59) <sup>***</sup>       | 0.41 (0.24, 0.59) <sup>***</sup>       | 0.22 (0.02, 0.42) <sup>*</sup>       | 0.32 (0.16, 0.48) <sup>***</sup>      |
|                                | Communication                    | 0.27 (0.02, 0.51) <sup>**</sup>        | <b>0.42 (0.26, 0.58)<sup>***</sup></b> | <b>0.57 (0.38, 0.75)<sup>***</sup></b> | 0.28 (0.06, 0.49) <sup>*</sup>       | 0.25 (0.06, 0.44) <sup>**</sup>       |
|                                | Motor                            | -0.07 (-0.24, 0.10)                    | -0.00 (-0.23, 0.21)                    | 0.08 (-0.16, 0.32)                     | <b>-0.04 (-0.22, 0.14)</b>           | <b>0.11 (-0.06, 0.28)</b>             |
|                                | Socio-emotional                  | 0.12 (-0.06, 0.31)                     | 0.22 (0.03, 0.40) <sup>*</sup>         | 0.30 (0.09, 0.52) <sup>**</sup>        | 0.13 (-0.02, 0.28)                   | 0.05 (-0.16, 0.26)                    |
| 31-36 months <sup>a</sup>      | BSID domains                     |                                        |                                        |                                        |                                      |                                       |
|                                | ESDI domains                     |                                        |                                        |                                        |                                      |                                       |
|                                | Cognitive                        | <b>0.46 (0.32, 0.60)<sup>***</sup></b> | 0.52 (0.40, 0.65) <sup>***</sup>       | 0.51 (0.39, 0.62) <sup>***</sup>       | 0.36 (0.18, 0.53) <sup>***</sup>     | 0.33 (0.17, 0.49) <sup>***</sup>      |
|                                | Communication                    | 0.36 (0.18, 0.53) <sup>***</sup>       | <b>0.36 (0.18, 0.53)<sup>**</sup></b>  | <b>0.44 (0.30, 0.58)<sup>***</sup></b> | 0.20 (0.06, 0.35) <sup>**</sup>      | 0.21 (0.05, 0.37) <sup>*</sup>        |
|                                | Motor                            | 0.38 (0.22, 0.53) <sup>***</sup>       | 0.38 (0.23, 0.54) <sup>***</sup>       | 0.41 (0.28, 0.55) <sup>***</sup>       | <b>0.22 (0.03, 0.40)<sup>*</sup></b> | <b>0.31 (0.13, 0.49)<sup>**</sup></b> |
| Socio-emotional                | 0.20 (0.00, 0.40)                | 0.25 (0.04, 0.46) <sup>*</sup>         | 0.41 (0.26, 0.57) <sup>***</sup>       | 0.27 (0.07, 0.46) <sup>**</sup>        | 0.26 (0.09, 0.44) <sup>**</sup>      |                                       |
| All ages combined <sup>a</sup> | BSID domains                     |                                        |                                        |                                        |                                      |                                       |
|                                | ESDI domains                     |                                        |                                        |                                        |                                      |                                       |
|                                | Cognitive                        | <b>0.37 (0.25, 0.50)<sup>***</sup></b> | 0.53 (0.42, 0.65) <sup>***</sup>       | 0.53 (0.43, 0.64) <sup>***</sup>       | 0.43 (0.31, 0.54) <sup>***</sup>     | 0.43 (0.30, 0.55) <sup>***</sup>      |
|                                | Communication                    | 0.44 (0.29, 0.59) <sup>***</sup>       | <b>0.51 (0.39, 0.64)<sup>***</sup></b> | <b>0.60 (0.49, 0.70)<sup>***</sup></b> | 0.40 (0.27, 0.52) <sup>***</sup>     | 0.37 (0.24, 0.50) <sup>***</sup>      |
|                                | Motor                            | 0.09 (-0.04, 0.22)                     | 0.12 (-0.02, 0.27)                     | 0.19 (0.05, 0.34) <sup>**</sup>        | <b>0.07 (-0.07, 0.20)</b>            | <b>0.16 (0.02, 0.30)<sup>*</sup></b>  |
| Socio-emotional                | 0.30 (0.16, 0.44) <sup>***</sup> | 0.37 (0.23, 0.50) <sup>***</sup>       | 0.45 (0.31, 0.59) <sup>***</sup>       | 0.34 (0.23, 0.46) <sup>***</sup>       | 0.29 (0.14, 0.43) <sup>***</sup>     |                                       |

<sup>a</sup>Pearson correlations (with IC 95%) and bootstrapping methods of 1,000 replications.

<sup>\*</sup>*p*-value <0.05; <sup>\*\*</sup>*p*-value <0.01; <sup>\*\*\*</sup>*p*-value <0.001
